# Supplementary material for: Integrating Mental Health and Addiction Treatment Into General Medical Care: The Role of Policy
Source: Atypon-hosted journal article supplement (doi:10.1176/appi.ps.202000183), 2020-06-03
Supplement: appi.ps.202000183.ds001.pdf [file appi.ps.202000183.ds001.pdf]

 


Psychiatry Online
