# Supplementary material for: Integrating Mental Health and Addiction Treatment Into General Medical Care: The Role of Policy
Source: Atypon-hosted journal article supplement (doi:10.1176/appi.ps.202000183), 2020-06-03
Supplement: appi.ps.202000183.ds001.pdf [file appi.ps.202000183.ds001.pdf]

## Further Reading

1. Atlantis E, Fahey P, Foster J. Collaborative care for comorbid depression and diabetes: a systematic review and meta-analysis. *BMJ open*. 2014;4(4):e004706.
2. Bao Y, Casalino LP, Pincus HA. Behavioral health and health care reform models: patient centered medical home, health home, and accountable care organization. *The journal of behavioral health services and research*. 2013;40:121-132.
3. Barry CL, Stuart EA, Donohue JM, et al. The Early Impact Of The 'Alternative Quality Contract' On Mental Health Service Use And Spending In Massachusetts. *Health affairs (Project Hope)*. Dec 2015;34(12):2077-2085.
4. Barry CL, Stuart EA, Donohue JM, et al. The Early Impact Of The 'Alternative Quality Contract' On Mental Health Service Use And Spending In Massachusetts. *Health affairs (Project Hope)*. Dec 2015;34(12):2077-2085.
5. Bazemore A, Phillips RL, Glazier R, Tepper J. Advancing primary care through alternative payment models: Lessons from the United States & Canada. *The Journal of the American Board of Family Medicine*. 2018;31(3):322-327
6. Beck A, Boggs JM, Alem A, et al. Large-scale implementation of collaborative care management for depression and diabetes and/or cardiovascular disease. *The Journal of the American Board of Family Medicine*. 2018;31(5):702-711.
7. Blount FA, Miller BF. Addressing the workforce crisis in integrated primary care. *Journal of Clinical Psychology in Medical Settings*. 2009;16(1):113.
8. Bluestein J. 21st Century Cures Act: Implications and Opportunities for States. <https://nashp.org/21st-century-cures-act-implications-and-opportunities-for-states/>, accessed February 28, 2020. 2016.
9. Bodenheimer T, Wagner EH, Grumbach K. Improving primary care for patients with chronic illness. *JAMA : the journal of the American Medical Association*. 2002;288(14):1775-1779.
10. Brown S. Excess mortality of schizophrenia. A meta-analysis. *The British journal of Psychiatry*. 1997;171:502-508.
11. Busch AB, Huskamp HA, McWilliams JM. Early efforts by Medicare accountable care organizations have limited effect on mental illness care and management. *Health Affairs*. 2016;35(7):1247-1256.
12. Busch AB, Huskamp HA, McWilliams JM. Early efforts by Medicare accountable care organizations have limited effect on mental illness care and management. *Health Affairs*. 2016;35(7):1247-1256.
13. Calloway MO, Morrissey JP. Overcoming service barriers for homeless persons with serious psychiatric disorders. *Psychiatric services (Washington, D.C.)*. 1998;49(12):1568-1572.
14. Cape J, Whittington C, Bower P. What is the role of consultation–liaison psychiatry in the management of depression in primary care? A systematic review and meta-analysis. *General hospital psychiatry*. 2010;32(3):246-254.
15. Casey DE. Metabolic issues and cardiovascular disease in patients with psychiatric disorders. *The American journal of medicine*. Apr 2005;118 Suppl 2:15S-22S.
16. Cohen BE, Edmondson D, Kronish IM. State of the art review: depression, stress, anxiety, and cardiovascular disease. *American journal of hypertension*. 2015;28(11):1295-1302.
17. Coleman K, Austin BT, Brach C, Wagner EH. Evidence on the chronic care model in the new millennium. *Health affairs*. 2009;28(1):75-85.

18. Counts NZ, Wrenn G, Muhlestein D. Accountable Care Organizations' Performance in Depression: Lessons for Value-Based Payment and Behavioral Health. *Journal of general internal medicine*. 2019;34(12):2898-2900.
19. Crowley RA, Kirschner N. The integration of care for mental health, substance abuse, and other behavioral health conditions into primary care: executive summary of an American College of Physicians position paper. *Annals of internal medicine*. 2015;163(4):298-299.
20. Daumit G, Anthony C, Ford DE, et al. Pattern of mortality in a sample of maryland residents with severe mental illness. *Psychiatry research*. 2010;176(2-3):242-245.
21. Degenhardt L, Peacock A, Colledge S, et al. Global prevalence of injecting drug use and sociodemographic characteristics and prevalence of HIV, HBV, and HCV in people who inject drugs: a multistage systematic review. *The Lancet Global Health*. 2017;5(12):e1192-e1207.
22. Dhar AK, Barton DA. Depression and the link with cardiovascular disease. *Frontiers in psychiatry*. 2016;7:33.
23. Doherty AM, Gaughran F. The interface of physical and mental health. *Social psychiatry and psychiatric epidemiology*. 2014;49(5):673-682.
24. Domino ME, Jackson C, Beadles CA, et al. Do primary care medical homes facilitate care transitions after psychiatric discharge for patients with multiple chronic conditions? *General hospital psychiatry*. 2016;39:59-65.
25. Draine J, Salzer MS, Culhane DP, Hadley TR. Roles of Social Disadvantage in Crime, Joblessness, and Homelessness Among Persons with Serious Mental Illness. *Psychiatric Services*. 2002;53(5).
26. Drake RE, Skinner JS, Bond GR, Goldman HH. Social Security And Mental Illness: Reducing Disability With Supported Employment. *Health Affairs*. May 1, 2009 2009;28(3):761-770.
27. Driessen J, Zhang Y. Trends in the inclusion of mental health providers in medicare shared savings program ACOs. *Psychiatric Services*. 2017;68(3):303-305.
28. Driessen J, Zhang Y. Trends in the inclusion of mental health providers in medicare shared savings program ACOs. *Psychiatric Services*. 2017;68(3):303-305.
29. Druss BG, Bornemann TH. Improving health and health care for persons with serious mental illness: the window for US federal policy change. *JAMA : the journal of the American Medical Association*. May 19 2010;303(19):1972-1973.
30. Durbin A, Durbin J, Hensel JM, Deber R. Barriers and enablers to integrating mental health into primary care: a policy analysis. *The journal of behavioral health services & research*. 2016;43(1):127-139.
31. Durbin A, Durbin J, Hensel JM, Deber R. Barriers and enablers to integrating mental health into primary care: a policy analysis. *The journal of behavioral health services & research*. 2016;43(1):127-139.
32. Fortney JC, Pyne JM, Smith JL, et al. Steps for implementing collaborative care programs for depression. *Population health management*. 2009;12(2):69-79.
33. Frank RG, Glied SA. *Better but not well: Mental health policy in the United States since 1950*. Baltimore: Johns Hopkins University Press; 2006.
34. Hall J, Cohen DJ, Davis M, et al. Preparing the workforce for behavioral health and primary care integration. *The Journal of the American Board of Family Medicine*. 2015;28(Supplement 1):S41-S51.
35. Hamblin A, Verdier J, Au M. State options for integrating physical and behavioral health care. *Baltimore, MD: Integrated Care Resource Center*. 2011.

36. Hamblin A, Verdier J, Au M. State options for integrating physical and behavioral health care. *Baltimore, MD: Integrated Care Resource Center*. 2011.
37. Hoge MA, Stuart GW, Morris J, Flaherty MT, Paris Jr M, Goplerud E. Mental health and addiction workforce development: Federal leadership is needed to address the growing crisis. *Health Affairs*. 2013;32(11):2005-2012.
38. Jackson GL, Powers BJ, Chatterjee R, et al. The patient-centered medical Home A Systematic review. *Annals of internal medicine*. 2013;158(3):169-178.
39. Julian Chun-Chung C, Jaffee K, Snowden L. Racial/ethnic disparities in the use of mental health services in poverty areas. *American Journal of Public Health*. May 2003 2003;93(5):792-797.
40. Kaye S, McKetin R, Duflou J, Darke S. Methamphetamine and cardiovascular pathology: a review of the evidence. *Addiction*. 2007;102(8):1204-1211.
41. Keaney F, Gossop M, Dimech A, et al. Physical health problems among patients seeking treatment for substance use disorders: A comparison of drug dependent and alcohol dependent patients. *Journal of Substance use*. 2011;16(1):27-37.
42. Kirschner NM, Doherty RB. *A system in need of change: restructuring payment policies to support patient-centered care: a Position Paper of the American College of Physicians*. American College of Physicians; 2006.
43. Kroening-Roche J, Hall JD, Cameron DC, Rowland R, Cohen DJ. Integrating behavioral health under an ACO global budget: barriers and progress in Oregon. *The American journal of managed care*. 2017;23(9):e303-e309.
44. Kroening-Roche J, Hall JD, Cameron DC, Rowland R, Cohen DJ. Integrating behavioral health under an ACO global budget: barriers and progress in Oregon. *The American journal of managed care*. 2017;23(9):e303-e309.
45. Lamb HR, Weinberger LE. Persons with severe mental illness in jails and prisons: a review. *New directions for mental health services*. Summer 2001(90):29-49.
46. Lewis VA, Colla CH, Tierney K, Van Citters AD, Fisher ES, Meara E. Few ACOs pursue innovative models that integrate care for mental illness and substance abuse with primary care. *Health Affairs*. 2014;33(10):1808-1816.
47. Lewis VA, Colla CH, Tierney K, Van Citters AD, Fisher ES, Meara E. Few ACOs pursue innovative models that integrate care for mental illness and substance abuse with primary care. *Health Affairs*. 2014;33(10):1808-1816.
48. Lin WC, Zhang J, Leung GY, Clark RE. Chronic physical conditions in older adults with mental illness and/or substance use disorders. *Journal of the American Geriatrics Society*. 2011;59(10):1913-1921.
49. Lipschitz JM, Benzer JK, Miller C, et al. Understanding collaborative care implementation in the Department of Veterans Affairs: core functions and implementation challenges. *BMC health services research*. 2017;17(1):691.
50. Mathers BM, Degenhardt L, Ali H, et al. HIV prevention, treatment, and care services for people who inject drugs: a systematic review of global, regional, and national coverage. *The Lancet*. 2010;375(9719):1014-1028
51. McDowell MJ, Busch AB, Sen AP, et al. Participation in accountable care organizations among hospitals offering substance use disorder and mental health services. *Psychiatric Services*. 2018;69(11):1131-1134.

52. McDowell MJ, Busch AB, Sen AP, et al. Participation in accountable care organizations among hospitals offering substance use disorder and mental health services. *Psychiatric Services*. 2018;69(11):1131-1134.
53. McGinty EE, Daumit GL. Epidemiology of Obesity. *Psychiatric Annals*. Oct 2011 2011;41(10):484-488.
54. Miller BF. When frontline practice innovations are ahead of the health policy community: The example of behavioral health and primary care integration. *The Journal of the American Board of Family Medicine*. 2015;28(Supplement 1):S98-S101.
55. Miller BF. When frontline practice innovations are ahead of the health policy community: The example of behavioral health and primary care integration. *The Journal of the American Board of Family Medicine*. 2015;28(Supplement 1):S98-S101.
56. O'Neill EA, Black DR. Collaborative care for individuals with bipolar disorder or schizophrenia and co-occurring physical health conditions: A systematic review. *Social Work in Mental Health*. 2017;15(6):705-729.
57. Oldham MA, Chahal K, Lee HB. A systematic review of proactive psychiatric consultation on hospital length of stay. *General hospital psychiatry*. 2019.
58. Osborn DP, Levy G, Nazareth I, Petersen I, Islam A, King MB. Relative risk of cardiovascular and cancer mortality in people with severe mental illness from the United Kingdom's General Practice Research Database. *Archives of general psychiatry*. Feb 2007;64(2):242-249.
59. Palinkas LA, Ell K, Hansen M, Cabassa L, Wells A. Sustainability of collaborative care interventions in primary care settings. *Journal of Social Work*. 2011;11(1):99-117.
60. Peikes D, Anglin G, Harrington M, et al. *Independent Evaluation of Comprehensive Primary Care Plus (CPC+): First Annual Report*. Mathematica Policy Research.
61. Peikes D, Dale S, Ghosh A, et al. The comprehensive primary care initiative: effects on spending, quality, patients, and physicians. *Health Affairs*. 2018;37(6):890-899.
62. Perkins R, Rinaldi M. Unemployment rates among patients with long-term mental health problems: A decade of rising unemployment. *Psychiatric Bulletin*. August 1, 2002 2002;26(8):295-298.
63. Randall I, Mohr DC, Maynard C. VHA patient-centered medical home associated with lower rate of hospitalizations and specialty care among veterans with posttraumatic stress disorder. *Journal for Healthcare Quality*. 2014.
64. Saha S, Chant D, McGrath J. A systematic review of mortality in schizophrenia: is the differential mortality gap worsening over time? . *Archives of general psychiatry*. 2007;64(10):1123-1131.
65. Sanchez K, Thompson S, Alexander L. Current strategies and barriers in integrated health care: a survey of publicly funded providers in Texas. *General hospital psychiatry*. 2010;32(1):26-32.
66. Saraceno B, van Ommeren M, Batniji R, et al. Barriers to improvement of mental health services in low-income and middle-income countries. *The Lancet*. 2007;370(9593):1164-1174.
67. Sessums LL, McHugh SJ, Rajkumar R. Medicare's vision for advanced primary care: new directions for care delivery and payment. *JAMA : the journal of the American Medical Association*. 2016;315(24):2665-2666.
68. Shirk C. Medicaid and mental health services. 2008.
69. Somers JM, Moniruzzaman A, Patterson M, et al. A randomized trial examining housing first in congregate and scattered site formats. *PLoS one*. 2017;12(1).
70. Soper M. Integrating Behavioral Health into Medicaid Managed Care: Design and Implementation Lessons from State Innovators. [https://www.chcs.org/media/BH-Integration-Brief\\_041316.pdf](https://www.chcs.org/media/BH-Integration-Brief_041316.pdf), Accessed February 28, 2020. 2016.

71. Soper M. Integrating Behavioral Health into Medicaid Managed Care: Design and Implementation Lessons from State Innovators. [https://www.chcs.org/media/BH-Integration-Brief\\_041316.pdf](https://www.chcs.org/media/BH-Integration-Brief_041316.pdf), Accessed February 28, 2020. 2016.
72. Steadman HJ, Osher FC, Pamela Clark Robbins B, Case B, Samuels S. Prevalence of serious mental illness among jail inmates. *Psychiatric Services*. 2009;60(6):761-765.
73. Stuart EA, Barry CL, Donohue JM, et al. Effects of accountable care and payment reform on substance use disorder treatment: evidence from the initial 3 years of the alternative quality contract. *Addiction*. 2017;112(1):124-133.
74. Tipirneni R, Vickery KD, Ehlinger EP. Accountable communities for health: moving from providing accountable care to creating health. *The Annals of Family Medicine*. 2015;13(4):367-369.
75. Wilson FA, Rampa S, Trout KE, Stimpson JP. Telehealth delivery of mental health services: an analysis of private insurance claims data in the United States. *Psychiatric Services*. 2017;68(12):1303-1306.
